# Supplementary material
Source: Springer Nature journal article supplement (https://www.springermedizin.de/resource/supplementary/12904_2012_155_MOESM7_ESM.pdf/9517736)

QUANTITATIVE STUDIES  
(N=169)

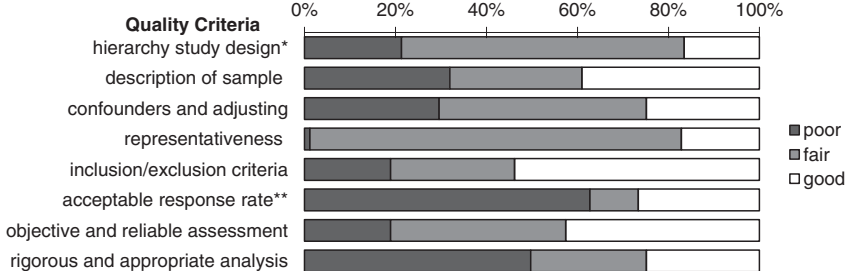

QUALITATIVE STUDIES (n=57)

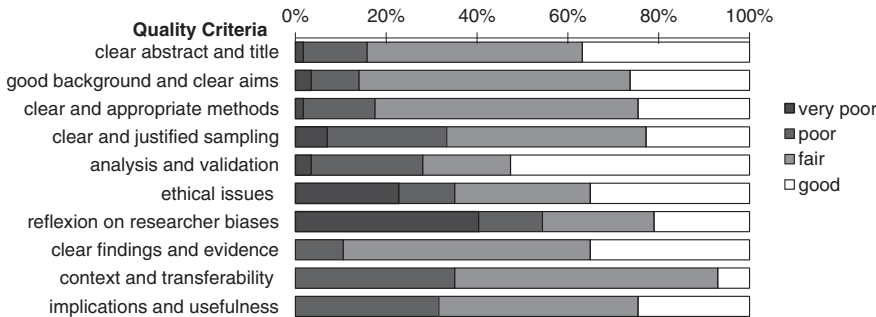

Supplement: MOESM7 [file 9517736]
